# Supplementary material
Source: HighWire-hosted journal article supplement (https://www.cmajopen.ca/highwire/filestream/81092/field_highwire_adjunct_files/0/2017-0160-1-at.pdf)
Supplement: 2017-0160-1-at.pdf [file 2017-0160-1-at.pdf]

**Appendix 1: Items used to create dependent variables of interest (continuity of care, quality of care and patient empowerment)**

| <b>Dimension and types</b> | <b>Definition</b>                                                                                   | <b>Item name, question and scale</b>                                                                                                                                                                                                                                                                                                                                                                                                                                                                                                                                                 | <b>Source</b>                                                |
|----------------------------|-----------------------------------------------------------------------------------------------------|--------------------------------------------------------------------------------------------------------------------------------------------------------------------------------------------------------------------------------------------------------------------------------------------------------------------------------------------------------------------------------------------------------------------------------------------------------------------------------------------------------------------------------------------------------------------------------------|--------------------------------------------------------------|
| <b>Continuity of care</b>  |                                                                                                     |                                                                                                                                                                                                                                                                                                                                                                                                                                                                                                                                                                                      |                                                              |
| Relational continuity      | Ongoing therapeutic patient-physician relationship (19,20)                                          | Concentrated care with regular provider (1 item)<br><i>Thinking of the past 12 months, when you went to see your regular doctor, how often were you taken care of by the same doctor? (Always, usually, sometimes, rarely, never)</i>                                                                                                                                                                                                                                                                                                                                                | Shi, Starfield and Xu (55)                                   |
|                            |                                                                                                     | Accumulated knowledge of the patient's medical history (1 item)<br><i>How would you rate your regular doctor's knowledge of your entire medical history? (Excellent, very good, good, fair, poor)</i>                                                                                                                                                                                                                                                                                                                                                                                | Adapted from the ACES (56)                                   |
| Informational continuity   | Sharing and use of information on patients' past clinical events and personal circumstances (19,20) | Information transfer across care levels (1 item)<br><i>In the last 12 months, how often did your regular doctor seem informed and up-to date about the care you received from any specialist doctors? (Always, usually, sometimes, rarely, never)</i>                                                                                                                                                                                                                                                                                                                                | Short form of the ACES (56)                                  |
| Management continuity      | Provision of different services in a coherent way and responsive to patients changing needs (19,20) | No duplication of tests or procedures (1 item)<br><i>Over the past 12 months, how many times did medical tests or procedures seem to be repeated unnecessarily? (Number of times)</i><br>Primary care follow up after specialist visit (1 item)<br><i>Thinking of the most recent time you saw or talked to a specialist, did you have a follow-up appointment with your regular doctor to talk about those health issues? (Yes; no, I haven't been back to my regular family doctor's office or medical clinic; no, my doctor never brought it up; no, there is another reason)</i> | Adapted from the CSE-PHC (57)<br>Short form of the ACES (56) |

| <b>Dimension and types</b> | <b>Definition</b>                                                                          | <b>Item name, question and scale</b>                                                                                                                                                                                                                                                                                                                                                                                                                                                                                                                                                                                                                                                                                                                                                                                                                                                                                                                                            | <b>Source</b>                                                |
|----------------------------|--------------------------------------------------------------------------------------------|---------------------------------------------------------------------------------------------------------------------------------------------------------------------------------------------------------------------------------------------------------------------------------------------------------------------------------------------------------------------------------------------------------------------------------------------------------------------------------------------------------------------------------------------------------------------------------------------------------------------------------------------------------------------------------------------------------------------------------------------------------------------------------------------------------------------------------------------------------------------------------------------------------------------------------------------------------------------------------|--------------------------------------------------------------|
| <b>Quality of care</b>     | Rating of quality in primary health care                                                   | Quality of care received from regular provider (1 item)<br><i>Overall, how do you rate the quality of primary health care that you have received in the past 12 months from your regular doctor? (Excellent, very good, good, fair, poor)</i>                                                                                                                                                                                                                                                                                                                                                                                                                                                                                                                                                                                                                                                                                                                                   | Adapted from the CSE-PHC (57)                                |
| <b>Patient empowerment</b> | Patients are given a sense that they have the ability to affect their health outcomes (24) | Patient empowerment (6 items) †<br><i>In the past 12 months how often did your doctor praise you for how you were taking care of your health? (Never, rarely, sometimes, usually, always)*</i><br><i>How often did your doctor help you feel that sticking with your treatment would make a difference? (Never, rarely, sometimes, usually, always)*</i><br><i>How often did your doctor help you feel that your everyday activities such as diet and lifestyle make a difference in your health? (Never, rarely, sometimes, usually, always)*</i><br><i>How often did your doctor help you feel confident about your ability to take care of your health? (Never, rarely, sometimes, usually, always)*</i><br><i>How often did your doctor give you a sense of control over your health? (Never, rarely, sometimes, usually, always)*</i><br><i>How often did your doctor help you feel you can prevent some health problems? (Never, rarely, sometimes, usually, always)*</i> | Adapted from the interpersonal processes of care survey (58) |

Note. A higher score = more of the concept; \* Scale reversed so higher score is better; † All items of this dimension were combined to create a scale, i.e. one variable; ACES, Ambulatory Care Experiences Survey; CSE-PHC, Canadian Survey of Experiences with Primary Health Care. The full patient experience questionnaire is available upon request at: [info@spor-bcphcrn.ca](mailto:info@spor-bcphcrn.ca)
